# Supplementary material
Source: publisher site journal article supplement (https://www.spandidos-publications.com/6630/downloadSupplementary)
Supplement: Supplementary file 1 [file downloadSupplementary]

|                                                  |   |   |   |   |   |   |   |   |   |   |
|--------------------------------------------------|---|---|---|---|---|---|---|---|---|---|
| Honda <i>et al</i> ,<br>2016 (17)                | * | * | * | - | * | - | * | * | - | 6 |
| Ammori <i>et al</i> ,<br>2018 (18)               | * | * | * | * | - |   | * | * | - | 6 |
| Asaoka <i>et al</i> ,<br>2019 (19)               | * | * | - | * |   | * | * | * | - | 6 |
| Ma <i>et al</i> , 2019<br>(20)                   | * | * | * | - | * | - | * | * | - | 6 |
| Xiao <i>et al</i> ,<br>2018 (21)                 | * | * | * | * | * | - | * | * | - | 7 |
| Cai <i>et al</i> ,<br>2022 (22)                  | * | * | * | * | * | * | * | * | - | 8 |
| Chen <i>et al</i> ,<br>2023 (23)                 | * | * | * | * | - | * | * | * | - | 7 |
| *Indicates 1 score. NOS, Newcastle-Ottawa Scale. |   |   |   |   |   |   |   |   |   |   |
